# Supplementary material
Source: publisher site journal article supplement (https://www.dovepress.com/article/592844)
Supplement: Supplementary file 1 [file 592844_Supplementary%20File.docx]

**Supplementary File.** Search Strategies in Databases

| **Database** | **Syntax** | **Num** | **Extract Date** |
| --- | --- | --- | --- |
| **WOS** | TS=(("Artificial Intelligence" OR AI OR "AI-written” OR "AI-generated" OR chatbot* OR ChatGPT OR "ChatGPT-generated" OR "GPT3" OR "OpenAI" OR "generative artificial intelligence” OR "natural language processing" OR NLP) AND (“medical education” OR ME OR “medical instruction” OR “medical pedagog*” OR “medical teaching” OR “medical training” OR “medical tuition” OR “Medical Sciences Education“ OR “Health Profession Education” OR “Biomedical Education”) AND ("teaching-learning" OR teaching AND learning OR “adult education” OR andrology OR “adult teaching” OR “adult learning”)) | **175** | 12/10/2024 |
| **pubMed** | ((((((((((((((((((((((((((((((((((((((((((((((((((((((("Artificial Intelligence"[Text Word]) OR ("Artificial Intelligence"[Title/Abstract])) OR (AI[Title/Abstract])) OR (AI[Text Word])) OR ("AI-written"[Text Word])) OR ("AI-written"[Title/Abstract])) OR ("AI-generated"[Title/Abstract])) OR ("AI-generated"[Text Word])) OR (chatbot*[Text Word])) OR (chatbot*[Title/Abstract])) OR (ChatGPT[Title/Abstract])) OR (ChatGPT[Text Word])) OR ("ChatGPT-generated"[Text Word])) OR ("ChatGPT-generated"[Title/Abstract])) OR ("GPT3"[Title/Abstract])) OR ("GPT3"[Text Word])) OR ("OpenAI"[Text Word])) OR ("OpenAI"[Title/Abstract])) OR ("generative artificial intelligence"[Title/Abstract])) OR ("generative artificial intelligence"[Text Word])) OR ("natural language processing"[Text Word])) OR ("natural language processing"[Title/Abstract])) OR (NLP[Title/Abstract])) OR (NLP[Text Word])) AND ("medical education"[Text Word])) OR ("medical education"[Title/Abstract])) OR (ME[Title/Abstract])) OR (ME[Text Word])) OR ("medical instruction"[Text Word])) OR ("medical instruction"[Title/Abstract])) OR ("medical pedagog*"[Title/Abstract])) OR ("medical pedagog*"[Text Word])) OR ("medical teaching"[Text Word])) OR ("medical teaching"[Title/Abstract])) OR ("medical training"[Title/Abstract])) OR ("medical training"[Text Word])) OR ("medical tuition"[Text Word])) OR ("medical tuition"[Title/Abstract])) OR ("Medical Sciences Education"[Title/Abstract])) OR ("Medical Sciences Education"[Text Word])) OR ("Health Profession Education"[Text Word])) OR ("Health Profession Education"[Title/Abstract])) OR ("Biomedical Education"[Title/Abstract])) OR ("Biomedical Education"[Text Word])) AND ("teaching-learning"[Text Word])) OR ("teaching-learning"[Title/Abstract])) OR (teaching[Title/Abstract] AND learning[Title/Abstract])) OR (teaching[Text Word] AND learning[Text Word])) OR ("adult education"[Text Word])) OR ("adult education"[Title/Abstract])) OR (andrology[Title/Abstract])) OR (andrology[Text Word])) OR ("adult teaching"[Text Word])) OR ("adult teaching"[Title/Abstract])) OR ("adult learning"[Title/Abstract])) OR ("adult learning"[Text Word]) | **2991** | 12/10/2024 |
| **Scopus** | TITLE-ABS-KEY(("Artificial Intelligence" OR AI OR "AI-written” OR "AI-generated" OR chatbot* OR ChatGPT OR "ChatGPT-generated" OR "GPT3" OR "OpenAI" OR "generative artificial intelligence” OR "natural language processing" OR NLP) AND (“medical education” OR ME OR “medical instruction” OR “medical pedagog*” OR “medical teaching” OR “medical training” OR “medical tuition” OR “Medical Sciences Education“ OR “Health Profession Education” OR “Biomedical Education”) AND ("teaching-learning" OR teaching AND learning OR “adult education” OR andrology OR “adult teaching” OR “adult learning”)) | **299** | 12/10/2024 |
| **Embase** | (("Artificial Intelligence" OR AI OR "AI-written” OR "AI-generated" OR chatbot* OR ChatGPT OR "ChatGPT-generated" OR "GPT3" OR "OpenAI" OR "generative artificial intelligence” OR "natural language processing" OR NLP) AND (“medical education” OR ME OR “medical instruction” OR “medical pedagog*” OR “medical teaching” OR “medical training” OR “medical tuition” OR “Medical Sciences Education“ OR “Health Profession Education” OR “Biomedical Education”) AND ("teaching-learning" OR teaching AND learning OR “adult education” OR andrology OR “adult teaching” OR “adult learning”)):ab,ti | **67** | 12/10/2024 |
| **Emerald** | title:"Artificial Intelligence" OR (title:"AI") OR (title:"R AI-written”") OR (title:"R AI-generated") AND (title:"“medical education”") OR (title:"“medical instruction”") OR (title:"“medical pedagog*”") AND (title:"teaching-learning") OR (title:"“adult education”") OR (title:"“adult teaching”") | **350** | 12/10/2024 |
| **Eric** | ti:(("Artificial Intelligence" OR AI OR "AI-written” OR "AI-generated" OR chatbot* OR ChatGPT OR "ChatGPT-generated" OR "GPT3" OR "OpenAI" OR "generative artificial intelligence” OR "natural language processing" OR NLP) AND (“medical education” OR ME OR “medical instruction” OR “medical pedagog*” OR “medical teaching” OR “medical training” OR “medical tuition” OR “Medical Sciences Education“ OR “Health Profession Education” OR “Biomedical Education”) AND ("teaching-learning" OR teaching AND learning OR “adult education” OR andrology OR “adult teaching” OR “adult learning”)) | **73** | 12/10/2024 |
| **IEEE** | ("Publication Title":"Artificial Intelligence" ) OR ("Publication Title":"AI-written”) OR ("Publication Title":"AI-generated" ) OR ("Publication Title":ChatGPT) AND ("Publication Title":“medical education”) OR ("Publication Title": “medical instruction”) OR ("Publication Title":“medical pedagog*”) AND ("Publication Title":"teaching-learning") OR ("Publication Title": “adult education”) OR ("Publication Title":andrology ) OR ("Publication Title": “adult teaching” ) | **774** | 12/10/2024 |
